# Supplementary material for: Temperature-dependent optical and vibrational properties of PtSe2 thin films
Source: PubMed Central journal article supplement (PMC7643157; doi:10.1038/s41598-020-76036-y), 2020-11-04
Supplement: 41598_2020_76036_MOESM1_ESM.pdf [file 41598_2020_76036_MOESM1_ESM.pdf]

## **Supplementary information**

### **Temperature-dependent optical and vibrational properties of PtSe<sub>2</sub> thin films**

Desman P. Gulo<sup>1</sup>, Han Yeh<sup>2</sup>, Wen-Hao Chang<sup>2</sup>, and Hsiang-Lin Liu<sup>1,\*</sup>

<sup>1</sup>Department of Physics, National Taiwan Normal University, Taipei 11677, Taiwan

<sup>2</sup>Department of Electrophysics, National Chiao Tung University, Hsinchu 30010, Taiwan

\*Corresponding author: [hliu@ntnu.edu.tw](mailto:hliu@ntnu.edu.tw)

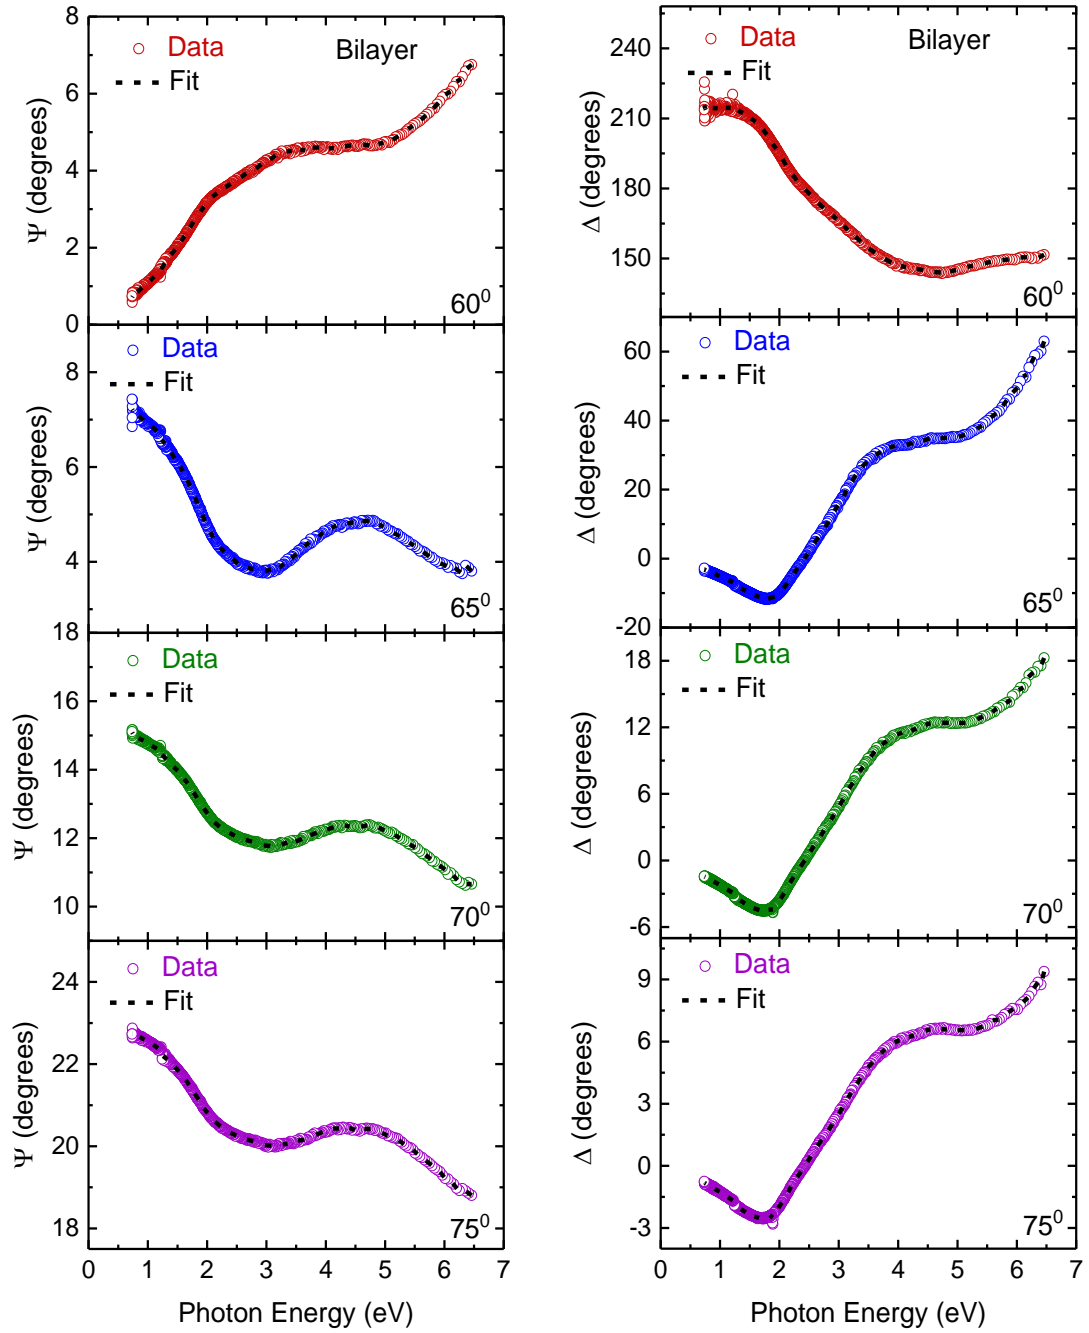

**Supplementary Fig. 1.** Room temperature experimental at 60°, 65°, 70°, and 75° incidence angles and fitting model of ellipsometric parameters of psi ( $\Psi$ ) and delta ( $\Delta$ ) of bilayer PtSe<sub>2</sub> thin film.

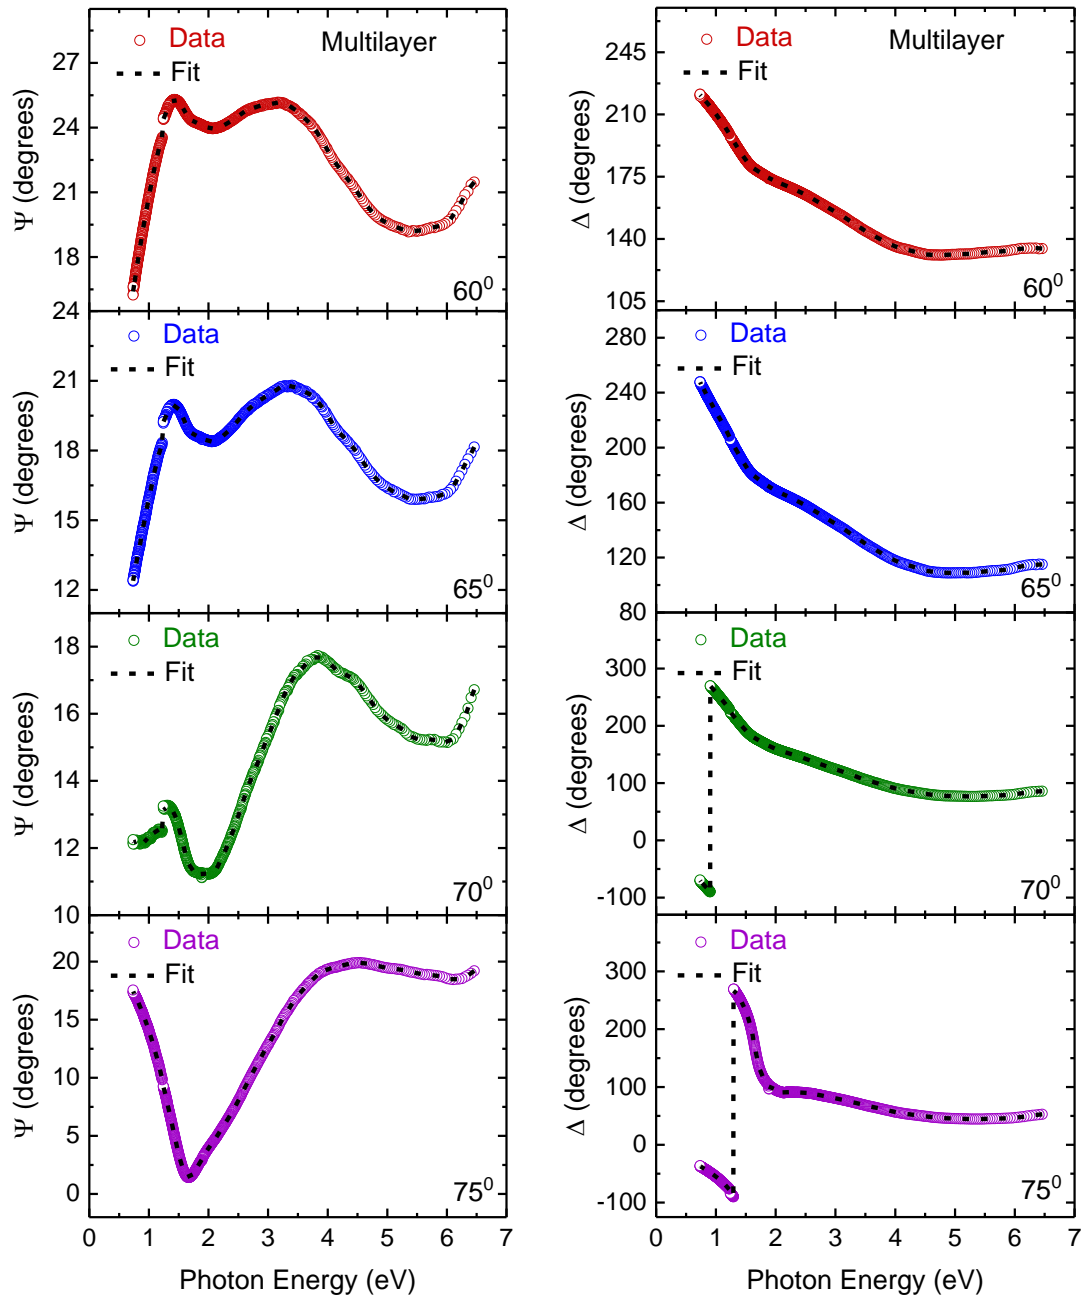

**Supplementary Fig. 2.** Room temperature experimental at 60°, 65°, 70°, and 75° incidence angles and fitting model of ellipsometric parameters of psi ( $\Psi$ ) and delta ( $\Delta$ ) of multilayer PtSe<sub>2</sub> thin film.

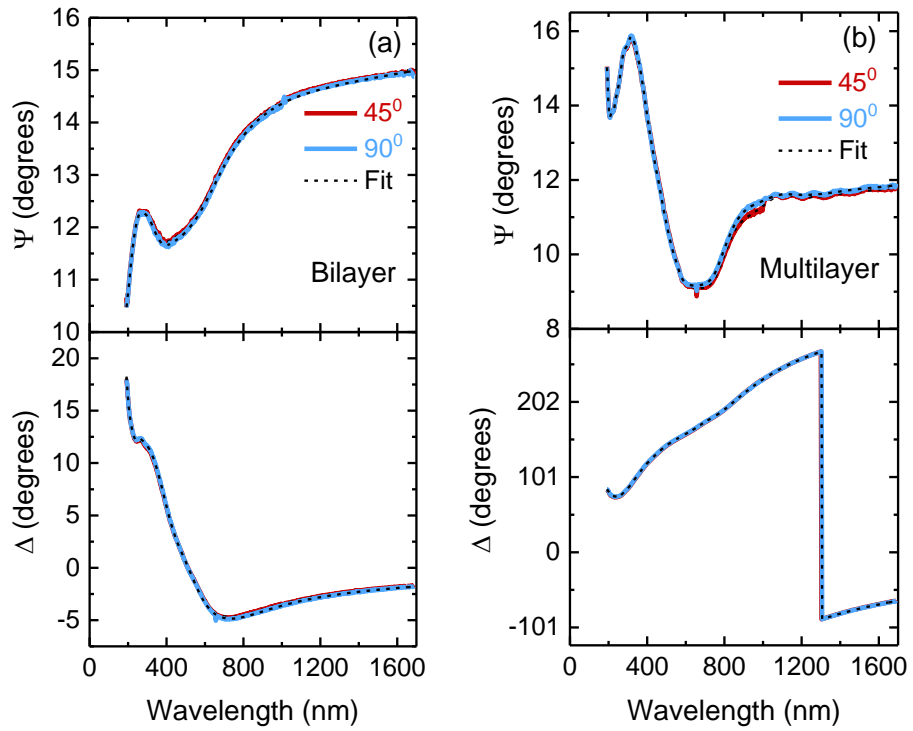

**Supplementary Fig. 3.** Room temperature experimental at 70° incidence angle and fitting model of ellipsometric parameters of psi ( $\Psi$ ) and delta ( $\Delta$ ) of (a) bilayer and (b) multilayer PtSe<sub>2</sub> thin films.

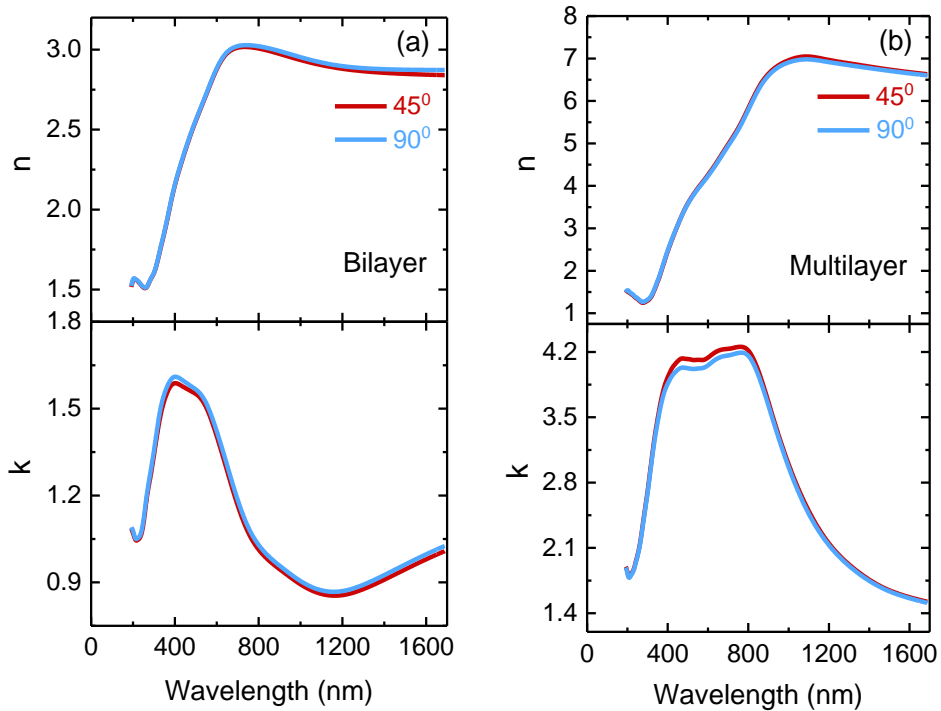

**Supplementary Fig. 4.** Room temperature refractive index and extinction coefficient of (a) bilayer and (b) multilayer PtSe<sub>2</sub> thin films by rotating the sample's azimuthal orientation of 45 and 90 degrees.

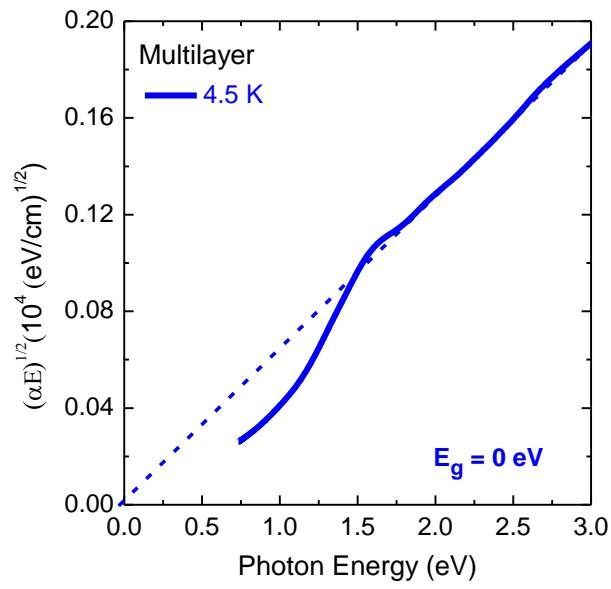

**Supplementary Fig. 5.** The plot of  $(\alpha \cdot E)^{1/2}$  vs. photon energy enables the extraction of indirect band gap of multilayer PtSe<sub>2</sub> thin films at 4.5 K.
